# Supplementary material for: Association between Circulating Irisin and C-Reactive Protein Levels: A Systematic Review and Meta-Analysis
Source: PubMed Central journal article supplement — Endocrinol Metab (Seoul). 2019 Jun 24;34(2):140–9. doi: 10.3803/EnM.2019.34.2.140 (PMC6599904; doi:10.3803/enm.2019.34.2.140), 2019-06-24
Supplement: enm-34-140-s002.pdf [file enm-34-140-s002.pdf]

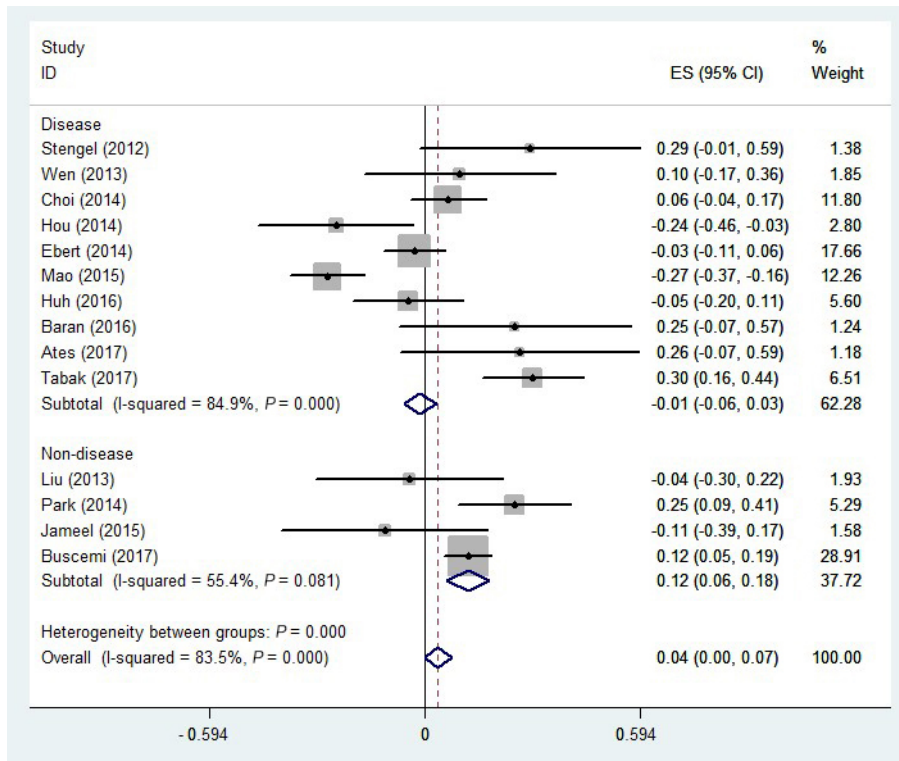

A

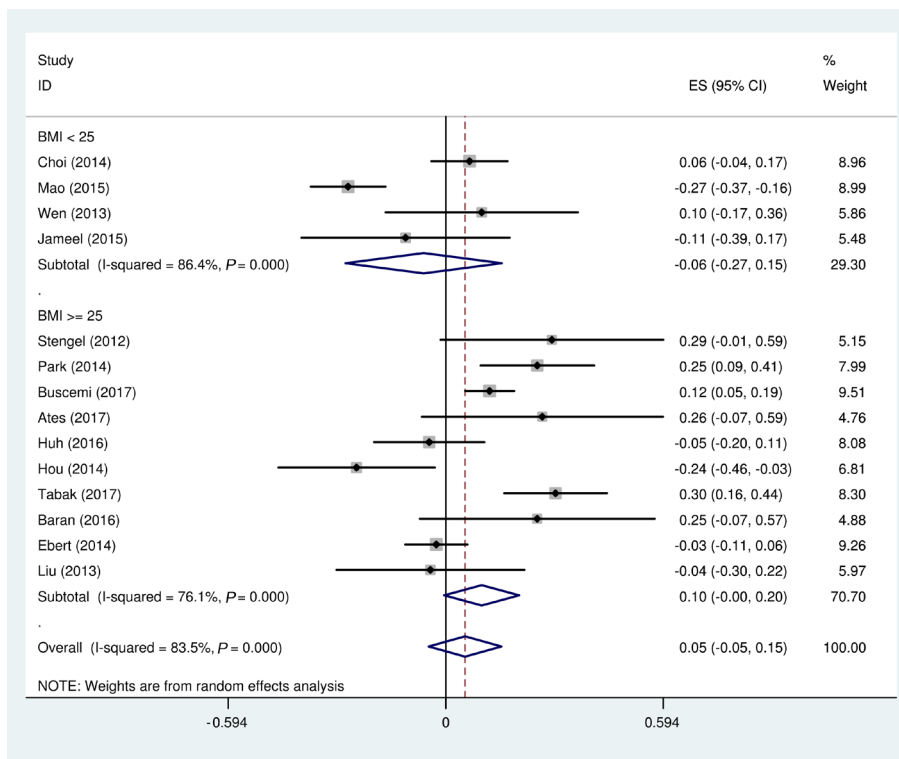

B

**Supplemental Fig. S1.** Forest plots of subgroup analyses based on (A) the disease status of the participants, (B) body mass index (BMI) of the participants. *(Continued to the next page)*

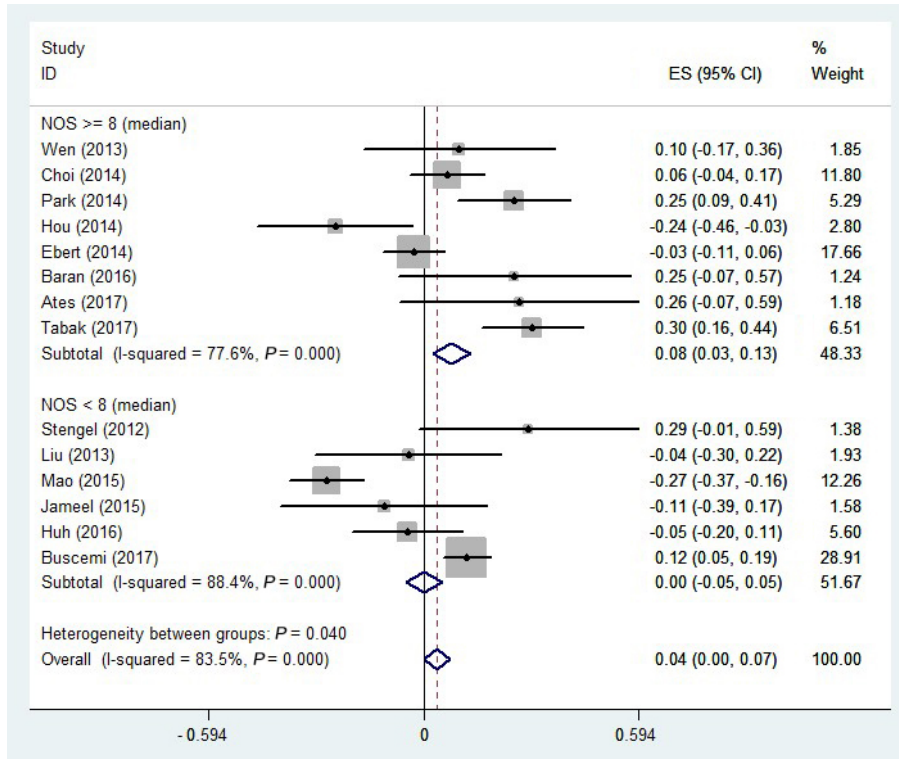

C

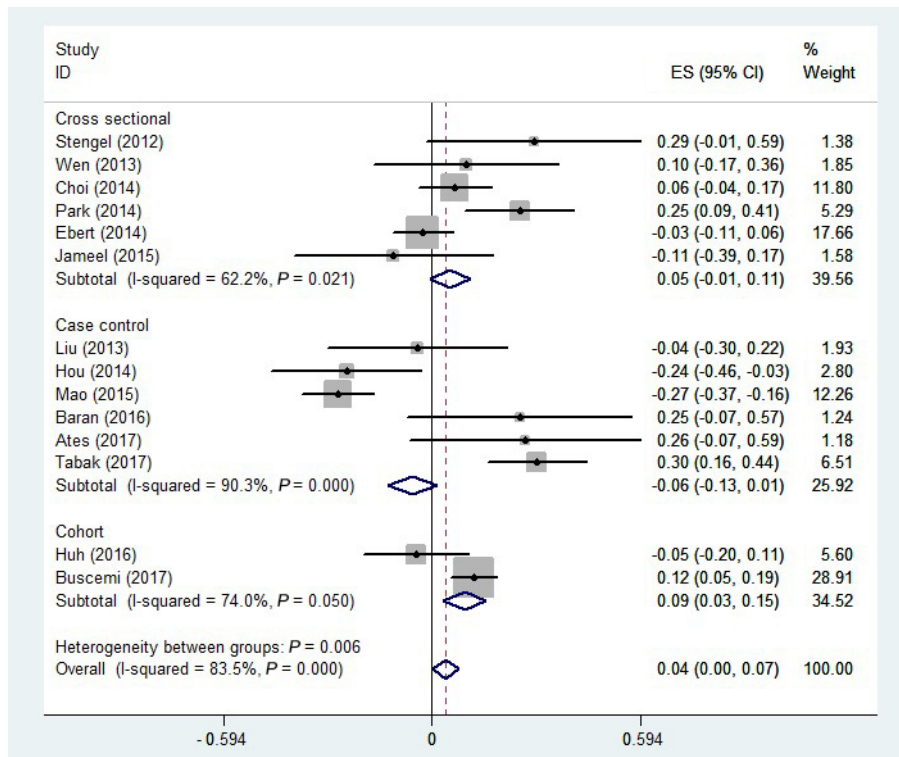

D

Supplemental Fig. S1. Continued. (C) Quality of the studies, (D) study design (cross-sectional vs. case-control vs. cohort).

(Continued to the next page)

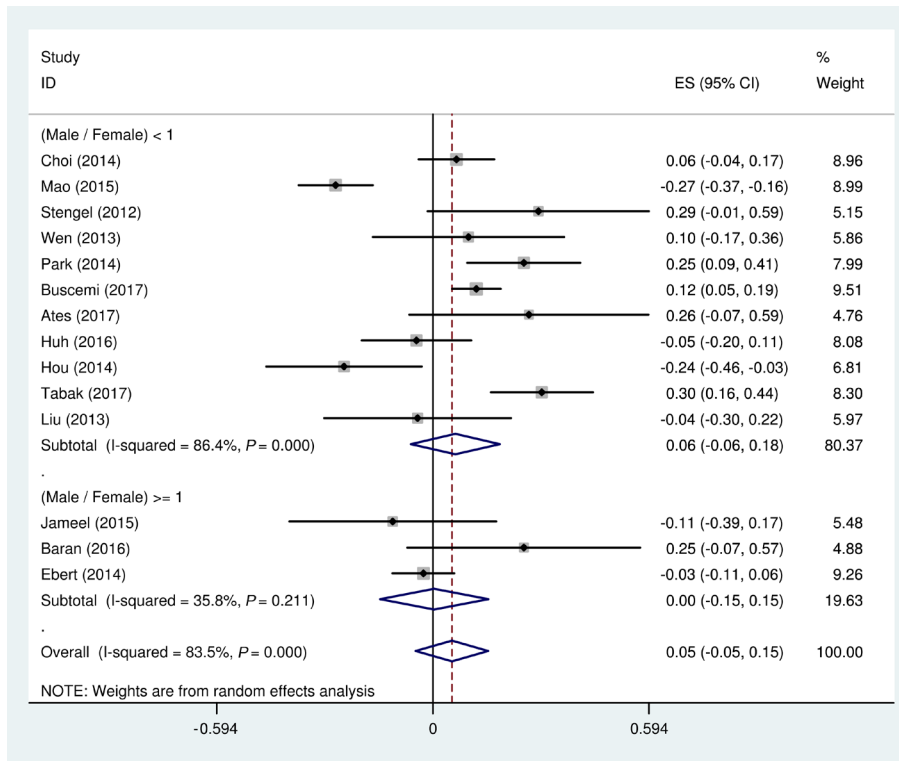

E

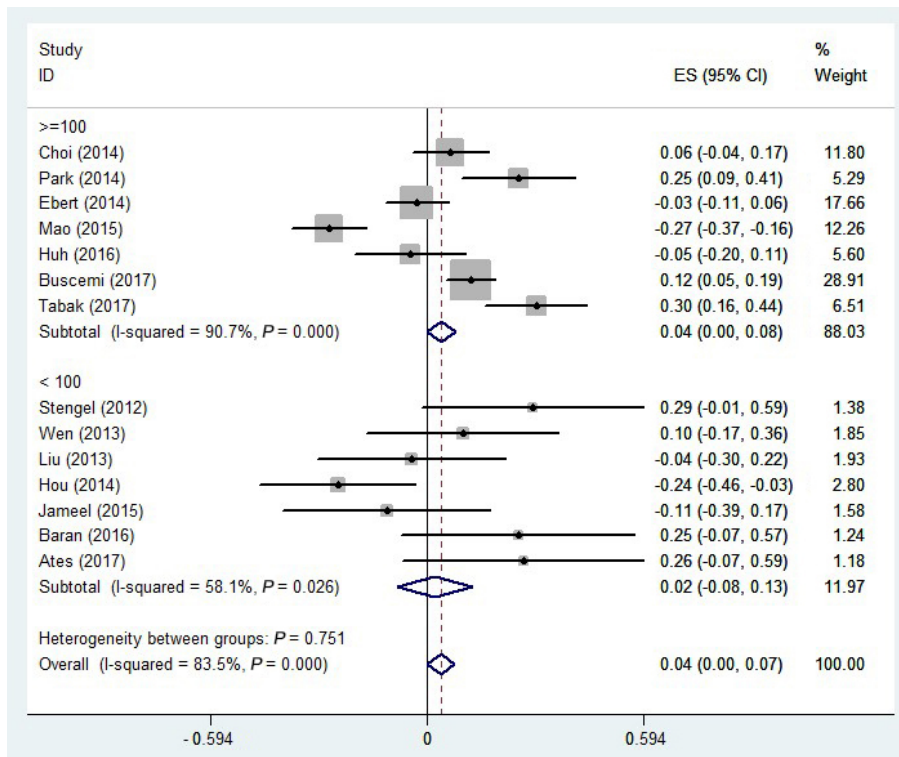

F

**Supplemental Fig. S1.** Continued. (E) Sex ratio (men vs. women), and (F) sample size. ES, effect size; CI, confidence interval; NOS, Newcastle-Ottawa Scale.
