# Supplementary material for: Association between Circulating Irisin and C-Reactive Protein Levels: A Systematic Review and Meta-Analysis
Source: PubMed Central journal article supplement — Endocrinol Metab (Seoul). 2019 Jun 24;34(2):140–9. doi: 10.3803/EnM.2019.34.2.140 (PMC6599904; doi:10.3803/enm.2019.34.2.140), 2019-06-24
Supplement: enm-34-140-s003.pdf [file enm-34-140-s003.pdf]

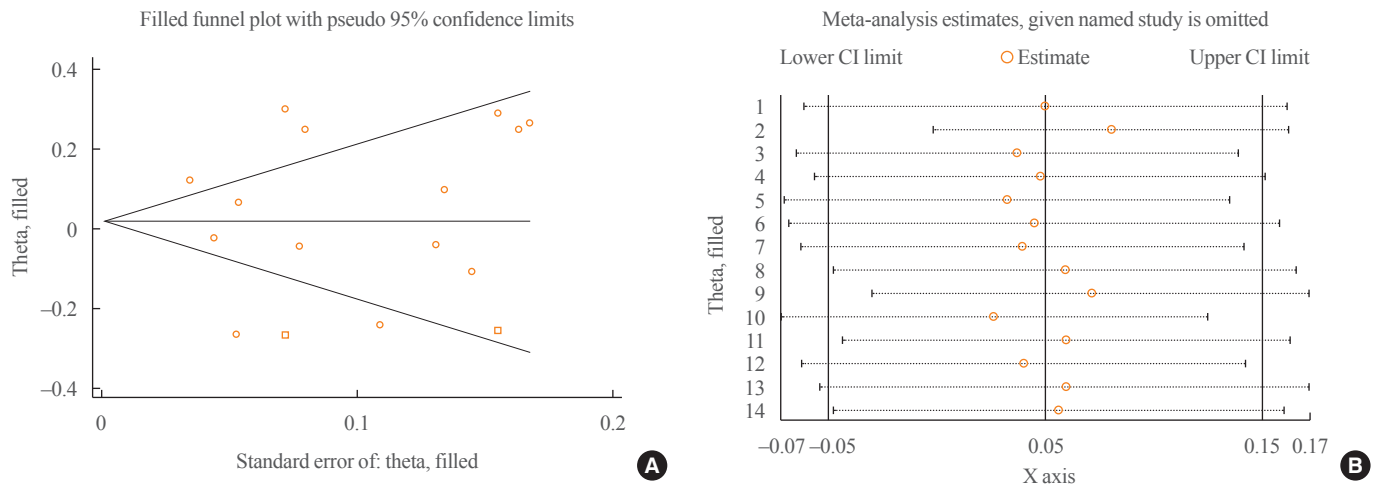

**Supplemental Fig. S2.** (A) Plot of the trim-and-fill analysis. (B) Plot of the sensitivity analysis results for the meta-analyses across all studies. CI, confidence interval.
